# Supplementary material for: The Interplay of the TLR-NFκB Signalling Pathway and Functional Enzymes in the LPS Inflammatory Response of Ciona robusta
Source: Preprints.org preprint supplement (doi:10.20944/preprints202406.1806.v1), 2024-06-26
Supplement: Supplementary file 1 [file supplementary]

**The interplay of the TLR-NFκB signalling pathway and functional enzymes in the LPS inflammatory response of *Ciona robusta***

L. Bisanti1,2, C. La Corte1,2, M. Dara1,2, F. Bertini1,2, J. Vizioli3, M.G. Parisi1,2, *M. Cammarata1,2, D. Parrinello1,2

1Department of Earth and Marine Sciences, Marine Immunobiology Laboratory, University of Palermo, 90128 Palermo (Italy)

2NBFC, National Biodiversity Future Center, 90133 Palermo (Italy)

3Inserm, Univ.Lille, Inserm, U1192-Protéomique Réponse Inflammatoire Spectrométrie de Masse-PRISM, F-59000 Lille (France)

*corresponding author: matteo.cammarata@unipa.it

**Supplementary materials**

**Figure**

**
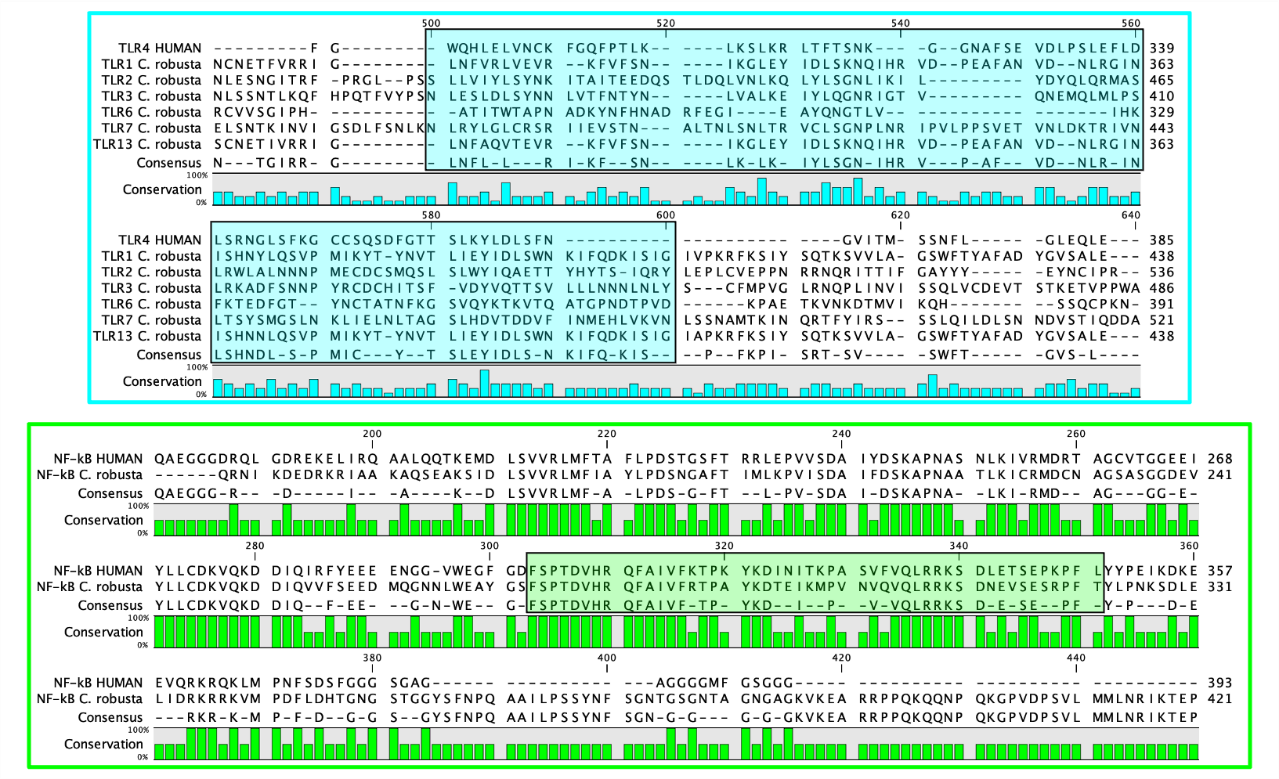
**

**Figure S1** The sequences of human TLR4 and NFκB used for alignment with *C. robusta* deposited sequences for systematic and comprehensive identification of antigen binding sites. The consensus contained in the coloured box improves the understanding of antigenic interactions that determine cross-reactions in the immunoblotting assays performed using *C. robusta* wall-body extracts. The references and accession numbers of the sequences used in the alignment are reported in supplementary Table S1.

**Table**

| **Species** | **Protein** | **Accession number** |
| --- | --- | --- |
| *Homo sapiens* | Toll-like Receptor 4 (TLR4) | UniProtKB O00206 |
| *Ciona robusta* | Toll-like Receptor 1 (TLR1) | GenBank NP_001159599.2 |
| *Ciona robusta* | Toll-like Receptor 2 (TLR2) | GenBank NP_001159600.1 |
| *Ciona robusta* | Toll-like Receptor 3 (TLR3) | GenBank XP_002120237.1 |
| *Ciona robusta* | Toll-like Receptor 6 (TLR6) | GenBank XP_002130253.1 |
| *Ciona robusta* | Toll-like Receptor 7 (TLR7) | GenBank NP_001231972.1 |
| *Ciona robusta* | Toll-like Receptor 13 (TLR13) | GenBank XP_002120520.2 |
| *Homo sapiens* | Nuclear Factor kappa B (NFκB) | UniProtKB P19838 |
| *Ciona robusta* | Nuclear Factor kappa B (NFκB) | GenBank NP_001071772.1 |

**Table S1** References and accession numbers of the sequences used for the sequence alignment of *C. robusta* with the antigenic epitopes of the antibodies employed in the immunoblotting assay.
